# Allostery through DNA drives phenotype switching

Gabriel Rosenblum<sup>1\*</sup>, Nadav Elad<sup>2</sup>, Haim Rozenberg<sup>1</sup>, Felix Wiggers<sup>1</sup>, and Hagen Hofmann<sup>1\*</sup>

<sup>1</sup>Department of Structural Biology and <sup>2</sup>Department of Chemical Research Support, Weizmann Institute of Science, Herzl St. 234, 76100 Rehovot, Israel

\*To whom correspondence may be addressed:

[hagen.hofmann@weizmann.ac.il](mailto:hagen.hofmann@weizmann.ac.il)

[gabriel.rosenblum@weizmann.ac.il](mailto:gabriel.rosenblum@weizmann.ac.il)

**Summary.** Allostery is a pervasive principle to regulate protein function. Here, we show that DNA also transmits allosteric signals over long distances to boost the binding cooperativity of transcription factors. Phenotype switching in *Bacillus subtilis* requires an all-or-none promoter binding of multiple ComK proteins. Using single-molecule FRET, we find that ComK-binding at one promoter site increases affinity at a distant site. Cryo-EM structures of the complex between ComK and its promoter demonstrate that this coupling is due to mechanical forces that alter DNA curvature. Modifications of the spacer between sites tune cooperativity and show how to control allostery, which paves new ways to design the dynamic properties of genetic circuits.

38 Allosterity is the structural coupling between ligand sites in biomolecules. Binding of a  
 39 ligand to one site facilitates or hampers the binding of a second ligand to a distant site<sup>1-5</sup>.  
 40 The resulting cooperativity regulates the activity of many proteins and molecular  
 41 machines<sup>6-8</sup> but it is also key for the behaviour of genetic circuits with binary<sup>9</sup>, oscillatory<sup>10</sup>,  
 42 excitable<sup>11,12</sup>, or pulsing<sup>13</sup> dynamics. The past decades have seen growing evidence that  
 43 allosterity is also an inherent property of DNA<sup>14-25</sup>, which has far reaching consequences for  
 44 our understanding of promoter sequences. Yet, most insights on DNA-mediated allosterity  
 45 upon transcription factor (TF) binding were either based on artificial promoters<sup>14,26</sup> or  
 46 found to be short-ranged<sup>19,20,25</sup>. Whether natural promoters evolved to efficiently transmit  
 47 allosteric signals across many nanometres remained largely unclear. Here, we show that  
 48 *Bacillus subtilis* bacteria utilize long-range allosterity in a stochastic and reversible  
 49 phenotype switch (Fig. 1a). In the competent phenotype, *B. subtilis* can take up DNA  
 50 from the medium<sup>11,27</sup>. The master regulator of the switch from vegetative to competent  
 51 cells is the TF ComK<sup>11,12</sup>. The model postulates a positive feedback regulation of *comK*  
 52 gene expression once ComK levels stochastically surpass a critical threshold (Fig. 1b)<sup>28</sup>.  
 53 The critical threshold acts like an analog-to-digital converter: the ComK target promoter is  
 54 inactive at low concentrations but it switches cooperatively to an active state within a  
 55 narrow ComK concentration range (Fig. 1c)<sup>11,12</sup>. Yet, how the promoter mediates  
 56 cooperative ComK binding is not known. By integrating single-molecule Förster resonance  
 57 energy transfer (smFRET) and cryo-electron microscopy (cryo-EM) we show how ComK  
 58 binding at one promoter site enhances binding to a distant site via allosteric changes of  
 59 DNA structure.

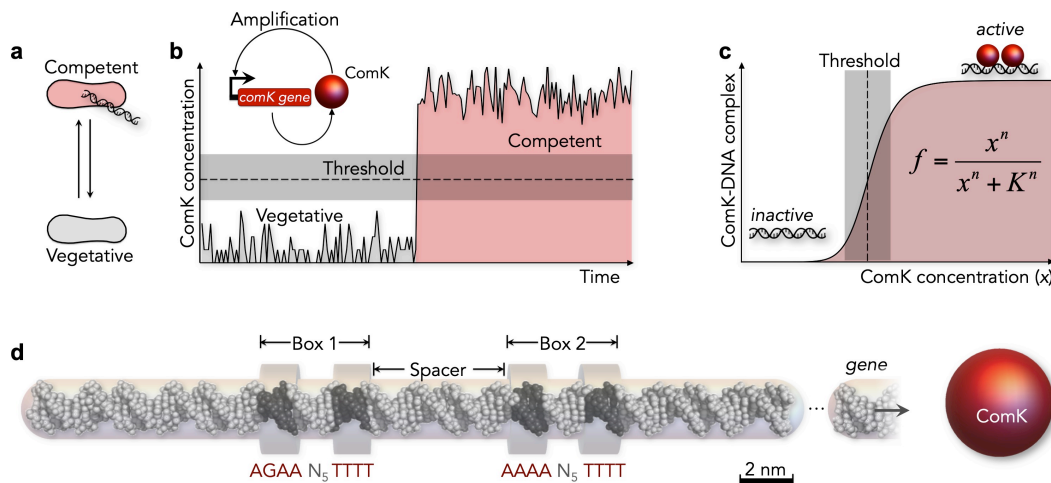

**Fig. 1. Schematics describing the model for phenotype switching in *B. subtilis*.** (a) *B. subtilis* can reversibly switch to a competent phenotype. (b) Switching is triggered by copy number fluctuations of ComK (gray) that, once stochastically exceeding a threshold (dashed line), cause its auto-amplification to high concentrations (red). (c) The threshold requires a cooperative DNA-binding of ComK, modelled by the Hill equation with cooperativity  $n$ , affinity  $K$ , and fraction of complexes  $f$ . (d) ComK promoters consist of two boxes separated by a spacer. Here, the *comG* promoter with an 18 bp spacer is shown. For size comparison, a ComK monomer (Stokes radius: 2.3 nm, Extended Data Fig. 2) is shown as red sphere.

60

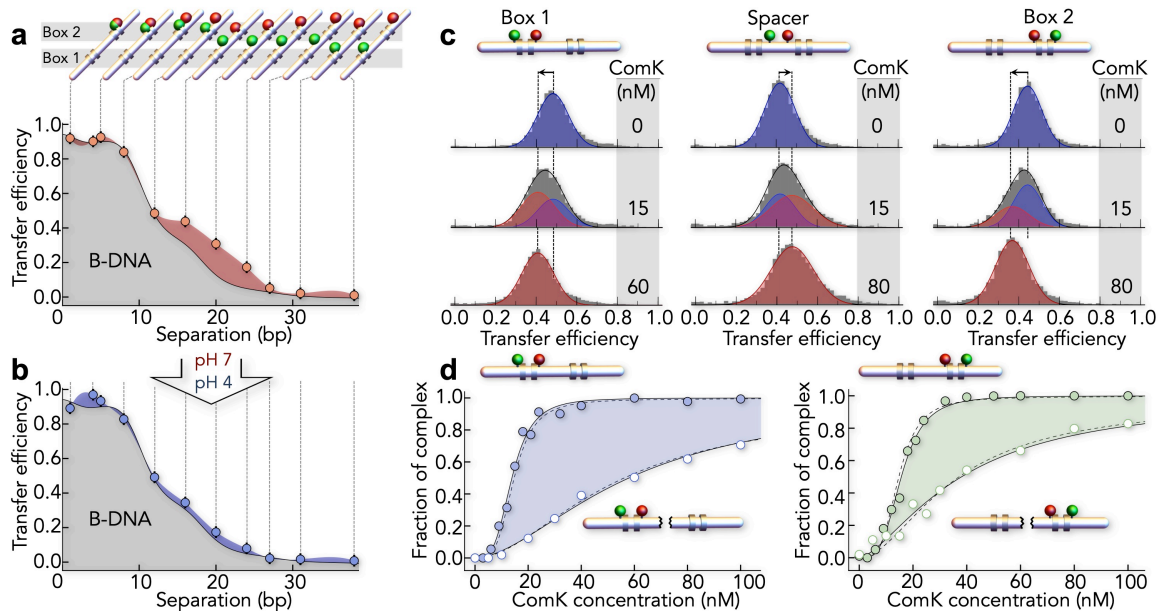

61

62

63

64 **Fig. 2. DNA-binding cooperativity of ComK probed with smFRET.** (a, b) Mapping of distances in box 2

65 with FRET at higher (a, pH 7) and lower (b, pH 4) persistence length. Grey region indicates the expected

66 dependence for B-DNA<sup>29</sup>. (c) SmFRET histograms of the *comG* promoter (93 bp) with an 18bp spacer

67 indicate a change in DNA on ComK binding. FRET is probed in box 1 (left), in the spacer (middle), and in

68 box 2 (right). Solid lines (black) are fits with super-positions of two Gaussian peaks for the free (blue) and

69 ComK-bound (red) promoter. (d) Fraction of the ComK-DNA complexes probed in box 1 (left) and box 2

70 (right) in the presence (filled circles) and absence (empty circles) of the respective other box. The single-box

71 constructs are 43 bp in length. Lines are fits with the Hill equation (solid) and with an induced-fit model

72 (dashed).

73 **Distant binding sites communicate:** ComK target promoters consist of two elements

74 (box 1 and box 2 hereafter) separated by spacer sequences of variable length (Fig. 1d)<sup>30</sup>.

75 Three spacers of 8, 18, and 31 base pairs (bp) are known in the ComK response genes

76 *addAB*, *comG*, and *comK*, respectively<sup>30</sup>. Each box in a promoter contains an adenine-

77 thymine (AT) rich sequence (Fig. 1d). Such A-tracts are ubiquitous throughout all

78 kingdoms of life, presumably due to their potential to curve DNA<sup>31,32</sup>. To assess the

79 structural properties of the promoter, we engineered a set of *comG* promoters (18 bp

80 spacer) that we site-specifically labelled with donor and acceptor fluorophores for confocal

81 smFRET measurements (Extended Data Table 1). When we compared the experimental

82 FRET efficiencies with theoretical values calculated for extended B-type DNA<sup>29</sup>, we noted

83 substantial deviations across one box, suggesting an overall curved topology (Fig. 2a).

84 Given that DNA curvature scales with DNA stiffness<sup>33</sup>, which is sensitive to the

85 protonation state of the phosphate backbone, we repeated the experiment under more

86 acidic conditions (pH 4.0, Fig. 2b). Indeed, we obtained reduced FRET values that better

87 agreed with the calculated B-DNA profile. These results indicated that the

88 *comG* promoter is curved at neutral pH. To probe ComK binding cooperativity, we

89 labelled the *comG* promoter with a FRET-pair either at each box or within the spacer  
90 (Fig. 2c). In the absence of ComK, we find FRET values between 0.4 and 0.5. Upon  
91 addition of ComK, the FRET peaks shift to lower values for box 1 and box 2, equivalent  
92 to  $\sim 3$  Å distance increase, whereas the FRET efficiency increased for the spacer region,  
93 corresponding to a distance reduction of similar magnitude (Fig. 2c). Whereas the  
94 measured changes in FRET efficiencies were small, we were able to accurately derive  
95 relative populations of free and ComK-bound *comG* molecules by fitting our data to super-  
96 positions of two-state Gaussian peaks (Fig. 2c). We found that the fraction of ComK-  
97 *comG* complexes indeed increased in a sigmoidal fashion with ComK concentrations  
98 (Fig. 2d), in agreement with the cooperative mode of binding required by mathematical  
99 models of the phenotype switch<sup>11,12,34</sup>. Fits with the Hill equation (Fig. 2d)<sup>35</sup> result in Hill  
100 exponents of  $n = 3.6 \pm 0.1$  for box 1 and  $n = 3.4 \pm 0.3$  for box 2. Independent controls  
101 with labelled ComK confirm that it is monomeric in solution (Extended Data Fig. 1-3). To  
102 interrogate coupling between box 1 and box 2, we created shorter single-box constructs  
103 (Fig. 2d, Extended Data Table 2). Remarkably, we obtained Hill coefficients of  
104  $n = 1.7 \pm 0.1$  for box 1 and  $n = 1.5 \pm 0.1$  for box 2, which confirmed earlier reports of  
105 a 2:1 (protein:DNA) stoichiometry per box<sup>30</sup>. The twofold higher Hill exponents in the  
106 natural promoter show that the FRET-probes on one box also report on ComK-binding to  
107 the other box, which requires an allosteric communication between the boxes.

108

109 **Structure of the complex:** One classical mechanism to achieve allostery is DNA looping  
110 that allows contacts between proteins bound to different boxes<sup>30,36</sup>. Alternatively, ComK  
111 may bridge the boxes by interacting with the spacer, which could explain the distance  
112 decrease in the spacer upon binding of ComK (Fig. 2c, middle). To distinguish between  
113 these options, we used single-particle cryo-electron microscopy (cryo-EM) to overcome the  
114 strong aggregation tendency and low stability of ComK (Extended Data Fig. 4-6). We  
115 determined structures of ComK bound to promoters with spacers of 8 bp (*addAB*: 57 bp,  
116 35.2 kDa) and 18 bp (*comG*: 93 bp, 57.5 kDa). Isolated DNA complexes of the expected  
117 size were readily identified in the cryo-EM micrographs (Extended Data Fig. 7) and 2D  
118 class averages revealed two major populations in both data sets (Fig. 3a, Extended Data  
119 Fig. 7). While the first population was pure promoter DNA, the second population  
120 contained DNA with extra density. Three observations are notable: (i) the extra density  
121 bound to DNA is confined to two locations that agree with the position of box 1 and 2,  
122 thus assigning this density to ComK; (ii) the DNA in these complexes is not looped, and  
123 (iii) only a few particles with ComK-density on only one box are found (Fig. 3b). The first  
124 observation demonstrates that ComK binds specifically to box 1 and 2 but not to the  
125 spacer between the boxes. Second, DNA-looping, as suggested in previous studies<sup>30,37</sup>, can  
126 be excluded as an allosteric mechanism by the 2D class averages. Indeed, we did not find

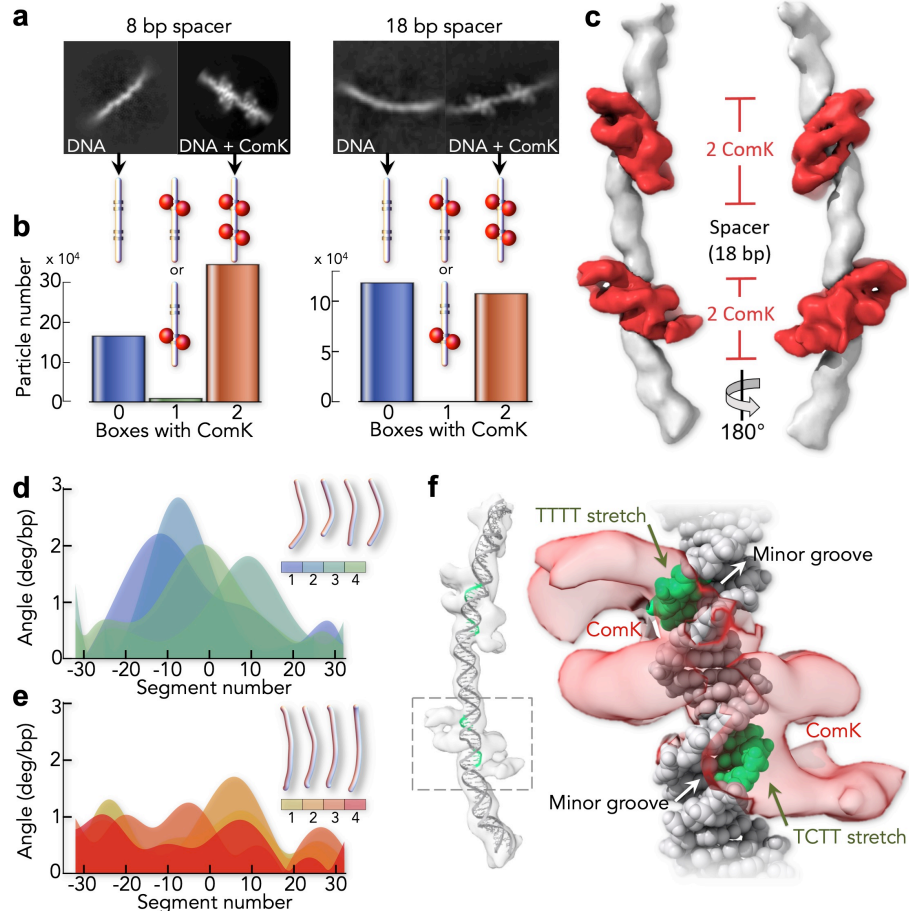

**Fig. 3. Single-particle cryo-EM analysis on ComK-DNA complexes.** (a) Class averages of free DNA and the ComK-DNA complex for the promoters with an 8 bp (left) and 18 bp (right) spacer. (b) Distribution of particles with different boxes bound to ComK for the promoters with an 8 bp (left) and 18 bp (right) spacer. (c) 3D reconstruction of ComK bound to the promoter with an 18 bp spacer (Extended Data Fig. 7: 3D class 1 with 8.9 Å resolution). DNA (white) and ComK (red) densities were segmented following flexibly fitting of double-stranded DNA. The ComK volume at each box corresponds to ~2 ComK molecules. (d, e) Curvature angles for free DNA (d) and the ComK-DNA complex (e) computed based on four 3D classes. Color code indicates the 3D classes with the overall shape of the DNA being indicated schematically. Angles between successive segments (segment length: 0.34 nm = 1bp) for different classes were aligned with respect to the middle of the DNA. Averaged over all segments, the difference in curvature angles is  $(0.3 \pm 0.2)^\circ/\text{bp}$ . (f) Flexible fitting of *comG* promoter DNA into 3D class 1 of the ComK-DNA complex (left) and orientations of ComK (red) relative to the A-tracts in a single box (right). ComK, shown at high iso-surface threshold, faces the thymine bases (green) in the minor groove (indicated). The DNA electron-density was subtracted and replaced by the fitted coordinates of the DNA model.

127 an increase in FRET efficiency upon ComK binding to promoters labelled at the 5' and 3'  
 128 end (Extended Data Fig. 10). Third, the lack of particles with ComK on only one box  
 129 even under the vitrified conditions used in cryo-EM (Fig. 3b) suggests an all-or-none  
 130 binding of the protein, in accord with the high cooperativity found with smFRET at room  
 131 temperature (Fig. 2d). To determine the precise ComK-DNA stoichiometry, we  
 132 reconstructed 3D-classes of the 18 bp spacer complex (Fig. 3c, Extended Data Fig. 7-9,  
 133 11). Although flexibility and preferred orientations limit the resolution to 8.9 Å, fitting of  
 134 DNA into the 3D map enabled us to distinguish DNA and ComK (Fig. 3c). Comparison of



135 the ComK mass in a box ( $42 \pm 3$  kDa) with that of a ComK monomer (22.6 kDa) yielded  
136 two ComK molecules per box ( $1.86 \pm 0.13$ ), i.e., four per promoter, in excellent accord  
137 with the Hill exponents (Fig. 2d). We further noted that ComK densities at individual  
138 boxes were continuous, which hints towards significant protein-protein contacts within a  
139 box (Fig. 3c). By contrast, we detected no ComK interactions across the spacer region,  
140 which suggests DNA-mediated allostery as source for the high binding cooperativity. To  
141 determine the allosteric mechanism, we analysed the DNA curvature of free (Fig. 3d) and  
142 bound promoters (Fig. 3e) and found a significant reduction in the presence of ComK,  
143 which hints at a potential mechanism. ComK is known to interact with the minor groove  
144 of DNA<sup>30</sup>, which is significantly narrower in A-tracts compared to B-DNA<sup>38</sup>. Indeed, a fit  
145 of our 3D density with an atomistic representation of the *comG* promoter suggests that  
146 ComK faces the minor groove by forming contacts with the thymine bases of the A-tracts  
147 (Fig. 3f, Extended Data Fig. 11). Altering the minor groove by ComK would lower DNA  
148 curvature around a box, thus affecting the width of the minor groove at the second box.  
149 Importantly, the model stipulates that DNA-mediated communication between boxes  
150 ought to be dependent on the spacer length.

151

152 **Mechanical force transduction in DNA:** To test this mechanism, we altered the  
153 spacer length and measured the effect on cooperativity using a binding model that is  
154 derived from the cryo-EM structures (Fig. 4a). Each box has two binding sites for ComK.  
155 The first ComK binds a box with the association constant  $K$ . The second molecule binds  
156 the same box with  $\sigma$ -fold increased affinity due to protein-protein contacts between the  
157 ComK molecules. Once the first box is saturated with ComK, the altered DNA curvature  
158 increases the affinity at the second box by a factor  $J$ . The quantity  $\Delta g_J = -k_B T \log J$  is the  
159 DNA-mediated coupling free energy between two boxes. Using this model, we examined  
160 the coupling between boxes using the three promoters *addAB*, *comG*, and *comK* with  
161 spacer lengths of 8, 18, and 31 bp, respectively (Fig. 4b). When analysing the binding  
162 isotherms (Fig. 4b), we found a significant decrease in the Hill exponent with increasing  
163 spacer length along with a decrease of the coupling free energy ( $-\Delta g_J$ ) from  $5.8 \pm 0.9 k_B T$   
164 (8 bp) to  $1.9 \pm 0.1 k_B T$  (31 bp) (Fig. 4c). The result shows that spacer length is key for  
165 allostery, in line with the idea that reducing promoter curvature is the main origin for  
166 allosteric signal transmission. Compared to allosteric effects found previously in artificial  
167 promoters without curvature<sup>14,23</sup>, the coupling free energies are almost threefold larger,  
168 which converts to a fortyfold stronger effect on the association constants. Hence, curvature  
169 changes, though not mandatory<sup>14,23</sup>, greatly enhance DNA-mediated allostery.

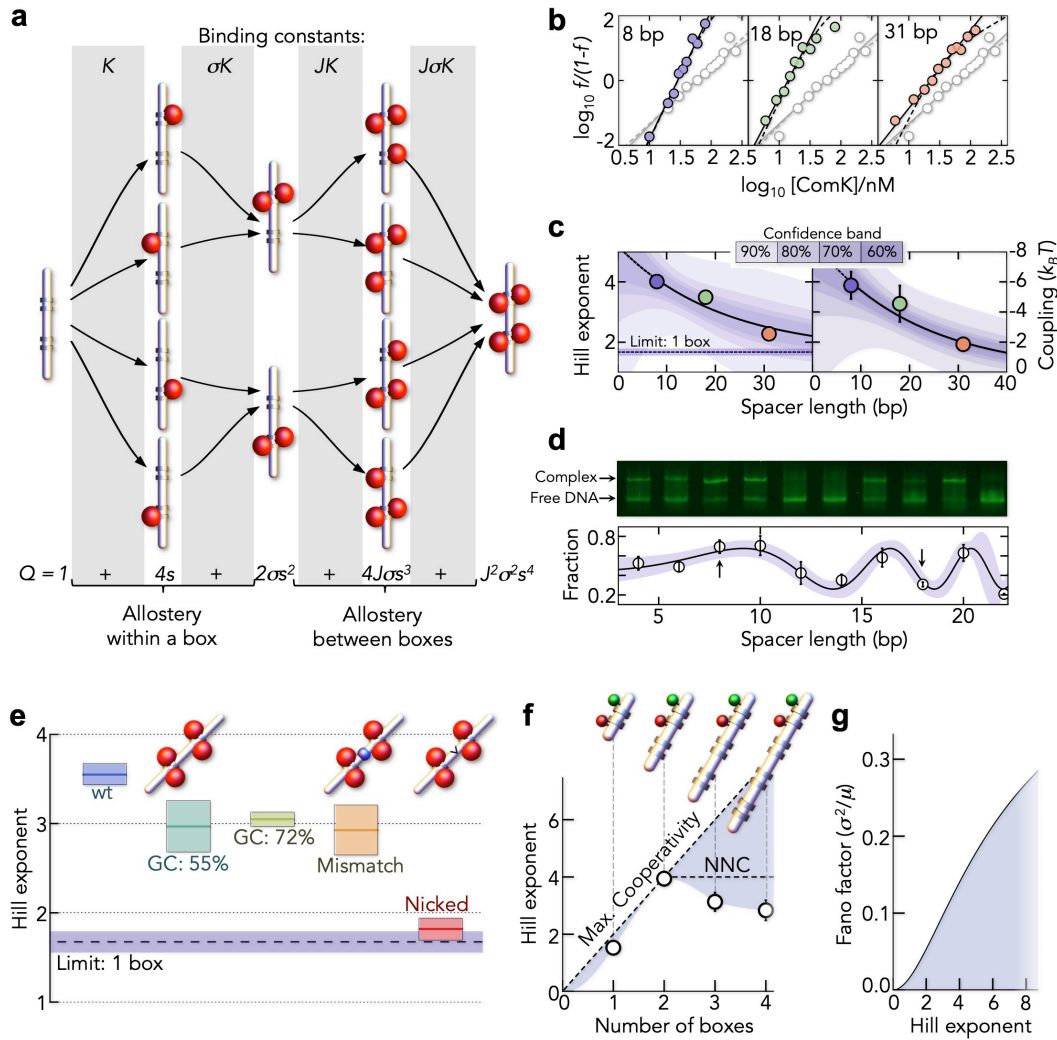

**Fig. 4. Tuning allostery.** (a) Schematics of the binding model with DNA (grey) and ComK (red). A single box is first occupied with 2 ComK molecules before the second box is bound. The model contains a microscopic association constant  $K$  and the allosteric parameters  $\sigma$  and  $J$  due to allostery within a box and between boxes, respectively. Binding constants for each step are identical for all paths. (Bottom) Binding polynomial ( $Q$ ) of the model with  $s = K [\text{ComK}]$ . (b) Hill-plots of the binding isotherms for promoters with varying spacer length (indicated) in comparison to an isolated box (grey). Solid lines are fits with the Hill-equation and dashed lines are fits with the model in A. (c) Hill exponents (left) and inter-box coupling free energies (right) as function of the spacer length. Solid lines are exponential fits and shaded areas indicate the confidence intervals of the fit. (d) Gel assay to screen ComK-binding to promoters with different spacer lengths with free DNA (lower band) and ComK-bound DNA (upper band) at a ComK concentration of 300 nM. (Bottom) Relative fraction of the ComK-DNA band as function of the spacer length. Arrows indicate promoters with 8 bp and 18 bp. Error bars indicate  $\pm$ SD of independent triplicates. Solid line is a fit with a cosine function with spacer-dependent frequency. Shaded area is the 90% confidence band. (e) Hill exponents for *comG*-promoters with modified spacer. Colored lines are the mean and boxes indicate  $\pm$ SD of at least two independent experiments. The dashed line indicates the limit of an isolated box. (f) Hill exponents of artificial promoters (8 bp spacer) with multiple boxes. The diagonal line indicates maximal cooperativity and the horizontal line indicates maximum nearest-neighbour cooperativity (NNC). Error bars represent the error of the fit. (g) Increase in the noise of the fraction of ComK-bound promoters with increasing cooperativity. ComK copy numbers were sampled ( $n = 10^5$ ) from a Poisson distribution with a mean of 9 molecules per cell ( $\sim 15$  nM). Variance ( $\sigma^2$ ) and mean ( $\mu$ ) of  $f$  (Fig. 1c) were computed for different Hill exponents with  $K_{\text{Hill}} = 15$  nM.

170 A theory of DNA bending predicts an exponential decay of  $\Delta g_J$  with increasing length of  
171 the spacer<sup>18</sup>. The decay length ( $\xi$ ) is given by  $\xi = (k_B T l_p / f)^{1/2}$  with the persistence length  
172  $l_p = 40 \text{ nm}$ <sup>39</sup> and a tension force  $f$ . We found  $\xi = 21 \pm 5 \text{ bp}$  and  
173  $f = 0.15 \pm 0.07 \text{ pN/bp}$  (Fig. 4c). Given the known energetic costs of DNA bending<sup>40</sup>, we  
174 estimated a  $0.2 \pm 0.1^\circ/\text{bp}$  change in curvature, which agrees well with the change  
175 determined from the cryo-EM structures (Fig. 3d,e). Yet, the coarse-grained model does  
176 not account for the helical periodicity of DNA. Indeed, a gel assay shows that the fraction  
177 of ComK-DNA complexes oscillates with the spacer length between the boxes (Fig. 4d)  
178 and it is likely that also the cooperativity will depend on whether two boxes are in-phase  
179 or out-of-phase with respect to the helical DNA-turns.

180

181 **Tuning allostery via DNA sequences:** To understand the sequence determinants of  
182 allostery, we altered the spacer sequence in *comG* by increasing its GC-content, thus  
183 increasing DNA stability. The GC-content of the native spacer (40%) is close to the  
184 genome average<sup>41</sup>. We generated two random spacer sequences of higher GC content (55%  
185 and 72%, Extended Data Table 2). Indeed, increasing GC-content lowered cooperativity  
186 (Fig. 4e). Nevertheless, the Hill exponents remained above the values found for the isolated  
187 boxes, suggesting that spacer sequences fine-tune allostery at best. Next, we tested  
188 whether allostery requires a correct base pairing by introducing a mismatch of four bases  
189 at the centre of the spacer. However, even though the Hill exponent is reduced compared  
190 to wild-type *comG*, it is comparable to those found for increased GC contents (Fig. 4e).  
191 Remarkably, this result suggests that the allosteric communication between boxes does not  
192 stringently require a continuous base pair stacking in the spacer, thus pointing at the DNA  
193 backbone as the major determinant for allostery. Indeed, when we introduce a nick in the  
194 spacer, cooperativity is abolished and we obtain a Hill exponent of  $n = 1.8 \pm 0.1$ , i.e.,  
195 close to the value found for the isolated boxes (Fig. 4e). We therefore conclude that  
196 curvature-induced tension between the boxes propagates mainly via an intact DNA  
197 backbone but it can be fine-tuned by the spacer sequence and length.

198 Finally, we tested promoters with multiple boxes. In fact, the *comG* promoter  
199 contains an A-tract located 10 bp upstream of the first box (Extended Data Table 2)<sup>37</sup>.  
200 Although this region is not occupied in our cryo-EM structure due to its imperfect  
201 sequence, increasing the number of perfect boxes may be a simple strategy to further boost  
202 cooperativity. However, even the presence of 4 boxes with short spacing (8 bp) does not  
203 increase the Hill exponent beyond the value found for the promoter with two boxes. This  
204 implies that curvature changes do not propagate across multiple boxes but rather mediate  
205 nearest-neighbour communication (Fig. 4f).

206



207 **Conclusions:** Our results show that DNA-mediated allostery generates high cooperativity  
208 in transcription factor binding via mechanical deformations of the DNA across distances of  
209 6 nm (18 bp). Notably, this mechanism is a built-in feature of natural ComK promoters to  
210 filter copy number fluctuations of ComK (Fig. 1b,c): copy numbers below the midpoint of  
211 the Hill curve leave the promoter unoccupied, those above the midpoint cause near full  
212 occupation. With increasing cooperativity, this filter increases the variability (noise) of free  
213 and bound promoters (Fig. 4g), which would also affect the ratio of vegetative and  
214 competent cells in a population. However, even if genetic circuits function in the  
215 deterministic regime of high copy numbers, sigmoidal dose responses of gene expression  
216 activity with transcription factor concentrations are key for their dynamics<sup>42-44</sup>. Altering  
217 the steepness of this response, i.e., the molecular cooperativity, will unambiguously alter  
218 these dynamics<sup>10,45</sup>. Hence, besides the architecture of wiring genes<sup>46,47</sup>, designing dose-  
219 response curves via promoter sequences will provide a new level of engineering the  
220 dynamics of gene networks in the future.

221

222 **Data and materials availability:** Cryo-EM maps and atomic coordinates have been  
223 deposited in the Electron Microscopy Data Bank (EMDB) and Protein Data Bank (PDB)  
224 under accession codes EMD-11022 and 6Z0S, respectively.

225

226 **Author Contributions:** G.R. and H.H. designed research. G.R. and F.W. labelled DNA  
227 constructs. G.R. and H.H. performed and analysed single-molecule experiments. G.R. and  
228 N.E. performed cryo-EM work and analysed these data. H.R. conducted the fitting of the  
229 3D map with an atomic model of the DNA. H.H. wrote the paper with the help of all  
230 authors.

231

232 **Acknowledgements:** We enjoyed the critical discussions and helpful comments of many  
233 colleagues. Our thanks go to Deborah Fass, Gilad Haran, Amnon Horovitz, Benjamin  
234 Schuler, and Philipp Selenko. We also thank Harry Greenblatt for computational support  
235 as well as Christian Dubiella and Ronen Gabizon for their help with the LC-MS. This  
236 research was supported by the Israel Science Foundation (grant no. 1549/15), the Benoziyo  
237 Fund for the Advancement of Science, the Carolito Foundation, the Gurwin Family Fund  
238 for Scientific Research, the Leir Charitable Foundation, and the Koshland family. The  
239 work was further supported by the Irving and Cherna Moskowitz Center for Nano and  
240 Bio-Nano Imaging at the Weizmann Institute of Science.

241

242

243

244

245 **References**

- 246 1 Monod, J. & Jacob, J. General conclusions: teleonomic mechanisms in cellular  
247 metabolism, growth, and differentiation. *Cold Spring Harb Symp Quant Biol* **26**,  
248 389-401 (1961).
- 249 2 Monod, J., Changeux, J.-P. & Jacob, F. Allosteric proteins and cellular control  
250 systems. *J Mol Biol* **6**, 306-329 (1963).
- 251 3 Monod, J., Wyman, J. & Changeux, J. P. On the nature of allosteric transitions: A  
252 plausible model. *J Mol Biol* **12**, 88-118 (1965).
- 253 4 Koshland, D. E. Application of a Theory of Enzyme Specificity to Protein  
254 Synthesis. *Proc Natl Acad Sci U S A* **44**, 98-104 (1958).
- 255 5 Koshland, D. E., Némethy, G. & Filmer, D. Comparison of experimental binding  
256 data and theoretical models in proteins containing subunits. *Biochemistry* **5**, 365-  
257 385 (1966).
- 258 6 Thirumalai, D., Hyeon, C., Zhuravlev, P. I. & Lorimer, G. H. Symmetry, Rigidity,  
259 and Allosteric Signaling: From Monomeric Proteins to Molecular Machines. *Chem*  
260 *Rev* **119**, 6788-6821 (2019).
- 261 7 Gruber, R. & Horovitz, A. Allosteric Mechanisms in Chaperonin Machines. *Chem*  
262 *Rev* **116**, 6588-6606 (2016).
- 263 8 Yuan, Y., Tam, M. F., Simplaceanu, V. & Ho, C. New look at hemoglobin  
264 allostery. *Chem Rev* **115**, 1702-1724 (2015).
- 265 9 Gardner, T. S., Cantor, C. R. & Collins, J. J. Construction of a genetic toggle  
266 switch in *Escherichia coli*. *Nature* **403**, 339-342, doi:10.1038/35002131 (2000).
- 267 10 Elowitz, M. B. & Leibler, S. A synthetic oscillatory network of transcriptional  
268 regulators. *Nature* **403**, 335-338, doi:10.1038/35002125 (2000).
- 269 11 Süel, G. M., Garcia-Ojalvo, J., Liberman, L. M. & Elowitz, M. B. An excitable  
270 gene regulatory circuit induces transient cellular differentiation. *Nature* **440**, 545-  
271 550, doi:10.1038/nature04588 (2006).
- 272 12 Maamar, H., Raj, A. & Dubnau, D. Noise in gene expression determines cell fate in  
273 *Bacillus subtilis*. *Science* **317**, 526-529, doi:10.1126/science.1140818 (2007).
- 274 13 Locke, J. C. W., Young, J. W., Fontes, M., Hernández Jiménez, M. J. & Elowitz,  
275 M. B. Stochastic pulse regulation in bacterial stress response. *Science* **334**, 366-369  
276 (2011).
- 277 14 Kim, S. *et al.* Probing allostery through DNA. *Science* **339**, 816-819 (2013).
- 278 15 Pohl, F. M., Jovin, T. M., Baehr, W. & Holbrook, J. J. Ethidium bromide as a  
279 cooperative effector of a DNA structure. *Proc Natl Acad Sci USA* **69**, 3805-3809  
280 (1972).
- 281 16 Hogan, M., Dattagupta, N. & Crothers, D. M. Transmission of allosteric effects in  
282 DNA. *Nature* **278**, 521-524 (1979).
- 283 17 Parekh, B. S. & Hatfield, G. W. Transcriptional activation by protein-induced  
284 DNA bending: evidence for a DNA structural transmission model. *Proc Natl Acad*  
285 *Sci USA* **93**, 1173-1177 (1996).

- 286 18 Rudnick, J. & Bruinsma, R. DNA-protein cooperative binding through variable-  
287 range elastic coupling. *Biophys J* **76**, 1725-1733 (1999).
- 288 19 Panne, D., Maniatis, T. & Harrison, S. C. An atomic model of the interferon-beta  
289 enhanceosome. *Cell* **129**, 1111-1123 (2007).
- 290 20 Moretti, R. *et al.* Targeted Chemical Wedges Reveal the Role of Allosteric DNA  
291 Modulation in Protein–DNA Assembly. *ACS Chem Biol*  
292 **3**, 220-229 (2008).
- 293 21 Koslover, E. F. & Spakowitz, A. J. Twist- and tension-mediated elastic coupling  
294 between DNA-binding proteins. *Phys Rev Lett* **102**, 178102 (2009).
- 295 22 Garcia, H. G. *et al.* Operator Sequence Alters Gene Expression Independently of  
296 Transcription Factor Occupancy in Bacteria. *Cell Rep* **2**, 150-161 (2012).
- 297 23 Singh, J. & Purohit, P. K. Elasticity as the Basis of Allostery in DNA. *J Phys*  
298 *Chem B* **123**, 21-28 (2019).
- 299 24 Dršata, T. *et al.* Mechanical Model of DNA Allostery. *J Phys Chem Lett* **5**, 3831-  
300 3835 (2014).
- 301 25 Hancock, S. P., Cascio, D. & Johnson, R. C. Cooperative DNA binding by proteins  
302 through DNA shape complementarity. *Nucleic Acids Res* **47**, 8874-8887 (2019).
- 303 26 Crothers, D. M. Biophysics. Fine tuning gene regulation. *Science* **339**, 766-767  
304 (2013).
- 305 27 Smits, W. K., Kuipers, O. P. & Veening, J.-W. Phenotypic variation in bacteria:  
306 the role of feedback regulation. *Nat Rev Microbiol* **4**, 259-271,  
307 doi:10.1038/nrmicro1381 (2006).
- 308 28 Turgay, K., Hahn, J., Burghoorn, J. & Dubnau, D. Competence in *Bacillus subtilis*  
309 is controlled by regulated proteolysis of a transcription factor. *EMBO J* **17**, 6730-  
310 6738, doi:10.1093/emboj/17.22.6730 (1998).
- 311 29 Wozniak, A. K., Schröder, G. F., Grubmüller, H., Seidel, C. A. M. & Oesterhelt, F.  
312 Single-molecule FRET measures bends and kinks in DNA. *Proc Natl Acad Sci*  
313 *USA* **105**, 18337-18342 (2008).
- 314 30 Hamoen, L. W., Van Werkhoven, A. F., Bijlsma, J. J., Dubnau, D. & Venema, G.  
315 The competence transcription factor of *Bacillus subtilis* recognizes short A/T-rich  
316 sequences arranged in a unique, flexible pattern along the DNA helix. *Genes &*  
317 *Development* **12**, 1539-1550 (1998).
- 318 31 Haran, T. E. & Mohanty, U. The unique structure of A-tracts and intrinsic DNA  
319 bending. *Q Rev Biophys* **42**, 41-81, doi:10.1017/S0033583509004752 (2009).
- 320 32 Hizver, J., Rozenberg, H., Frolow, F., Rabinovich, D. & Shakked, Z. DNA bending  
321 by an adenine--thymine tract and its role in gene regulation. *P Natl Acad Sci Usa*  
322 **98**, 8490-8495 (2001).
- 323 33 Stellwagen, E., Peters, J. P., Maher, L. J. & Stellwagen, N. C. DNA A-tracts are  
324 not curved in solutions containing high concentrations of monovalent cations.  
325 *Biochemistry* **52**, 4138-4148 (2013).

326 34 Schultz, D., Ben Jacob, E., Onuchic, J. N. & Wolynes, P. G. Molecular level  
327 stochastic model for competence cycles in *Bacillus subtilis*. *Proc Natl Acad Sci*  
328 *USA* **104**, 17582-17587, doi:10.1073/pnas.0707965104 (2007).

329 35 Hill, A. V. The possible effects of the aggregation of the molecules of haemoglobin  
330 on its dissociation curves. *J Physiol (Lond)* **40**, iv - vii (1910).

331 36 Hertel, K. J., Lynch, K. W. & Maniatis, T. Common themes in the function of  
332 transcription and splicing enhancers. *Curr Opin Cell Biol* **9**, 350-357 (1997).

333 37 Susanna, K. A. *et al.* Mechanism of transcription activation at the comG promoter  
334 by the competence transcription factor ComK of *Bacillus subtilis*. *J Bacteriol* **186**,  
335 1120-1128 (2004).

336 38 Hud, N. V. & Plavec, J. A unified model for the origin of DNA sequence-directed  
337 curvature. *Biopolymers* **69**, 144-158 (2003).

338 39 Wang, M. D., Yin, H., Landick, R., Gelles, J. & Block, S. M. Stretching DNA with  
339 optical tweezers. *Biophys J* **72**, 1335-1346 (1997).

340 40 Privalov, P. L., Dragan, A. I. & Crane-Robinson, C. The cost of DNA bending.  
341 *Trends Biochem Sci* **34**, 464-470 (2009).

342 41 Kunst, F. *et al.* The complete genome sequence of the Gram-positive bacterium  
343 *Bacillus subtilis*. *Nature* **390**, 249-256 (1997).

344 42 Santillan, M. On the Use of the Hill Functions in Mathematical Models of Gene  
345 Regulatory Networks. *Mathematical Modelling of Natural Phenomena* **3**, 85-97.

346 43 Gonze, D., Abou-Jaoudé, W., Ouattara, D. A. & Halloy, J. How molecular should  
347 your molecular model be? On the level of molecular detail required to simulate  
348 biological networks in systems and synthetic biology. *Meth Enzymol* **487**, 171-215,  
349 doi:10.1016/B978-0-12-381270-4.00007-X (2011).

350 44 Alon, U. *An introduction to systems biology: design principles of biological circuits*.  
351 12-16 (Chapman and Hall/CRC, 2007).

352 45 Buse, O., Pérez, R. & Kuznetsov, A. Dynamical properties of the repressilator  
353 model. *Physical Review E* **81**, 066206 (2010).

354 46 Itzkovitz, S., Kashtan, N., Chklovskii, D. & Alon, U. Network Motifs: Simple  
355 Building Blocks of Complex Networks. *Science* **298**, 824-827 (2002).

356 47 Shen-Orr, S. S., Milo, R., Mangan, S. & Alon, U. Network motifs in the  
357 transcriptional regulation network of *Escherichia coli*. *Nat Genet* **31**, 64-68,  
358 doi:10.1038/ng881 (2002).

359  
360
